# Supplementary material for: Targeting human telomeric G-quadruplex DNA with curcumin and its synthesized analogues under molecular crowding conditions
Source: Royal Society of Chemistry journal article supplement (doi:10.1039/c5ra17390f), 2015-12-17
Supplement: c5ra17390f1.pdf [file c5ra17390f1.pdf]

## Supporting Information

### Targeting human telomeric G- quadruplexes DNA with curcumin and its synthesized analogues under molecular crowding condition

Niki S. Jha\*<sup>1</sup>, Satyendra Mishra<sup>2§</sup>, Ashalatha S. Mamidi<sup>3§</sup>, Archita Mishra<sup>3§</sup>, Shailendra K. Jha<sup>4</sup>  
and Avadhesh Surolia\*<sup>3</sup>

<sup>1</sup>Department of Chemistry, National Institute of Technology, Patna-800005, India

<sup>2</sup>Indian Institute of Advanced Research, Gujarat-382007, India

<sup>3</sup>Molecular Biophysics Unit, Indian Institute of Science, Bangalore 560012, India

<sup>4</sup>CSIR-Central Electrochemical Research Institute, Karaikudi, Tamil Nadu, India

#### Author Information

#### Corresponding Authors

\*Email: [surolia@mbu.iisc.ernet.in](mailto:surolia@mbu.iisc.ernet.in). Tel: 91-80-2293-2714. Fax: 91-80-2360-0535

\*Email: [nikij@nitp.ac.in](mailto:nikij@nitp.ac.in). Tel: 91-612-2260004

§Equal Contribution

**Table S1.** Contribution of Coulombic interactions to binding free energies of curcumin and its derivatives when docked to G-quadruplex hybrid form structure and the double stranded dodecamer B-DNA

| Ligands                                      | G-quadruplex DNA<br>( $\Delta G$ kJ/mol) | B-DNA<br>( $\Delta G$ kJ/mol) |
|----------------------------------------------|------------------------------------------|-------------------------------|
| Curcumin                                     | -71964.83                                | -3522.48                      |
| Pyrazole curcumin                            | 122.84                                   | 251.26                        |
| N-(3-Fluorophenyl) pyrazole curcumin         | -0.09                                    | 144.92                        |
| N-(3-Nitrophenyl) pyrazole curcumin          | 114.42                                   | 170.62                        |
| 4-(4-Hydroxy-3-methoxy) benzylidene curcumin | 11.69                                    | 126.29                        |

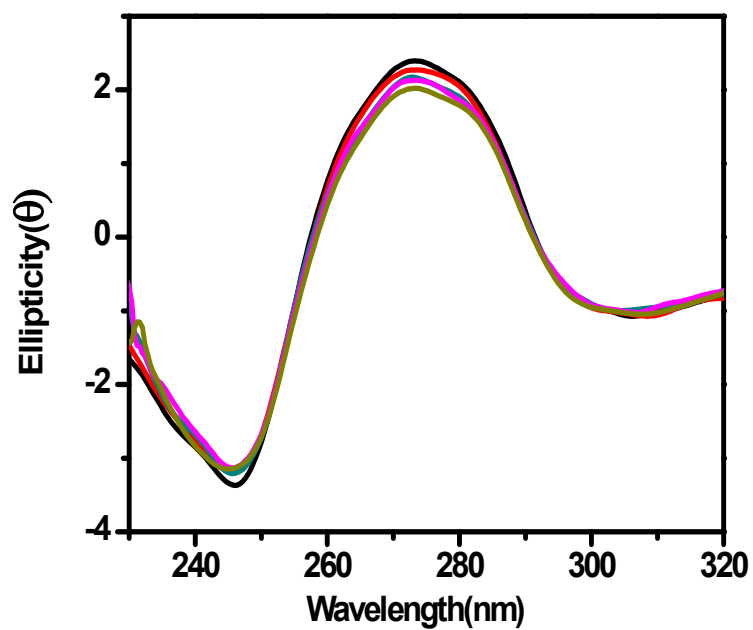

**Figure S1:** CD spectra of 5  $\mu\text{M}$  ct-DNA with curcumin (0, 2, 4, 10, 15 and 20  $\mu\text{M}$ ) respectively in 10 mM Tris-HCl having 100 mM KCl and 10% PEG, pH 7.4

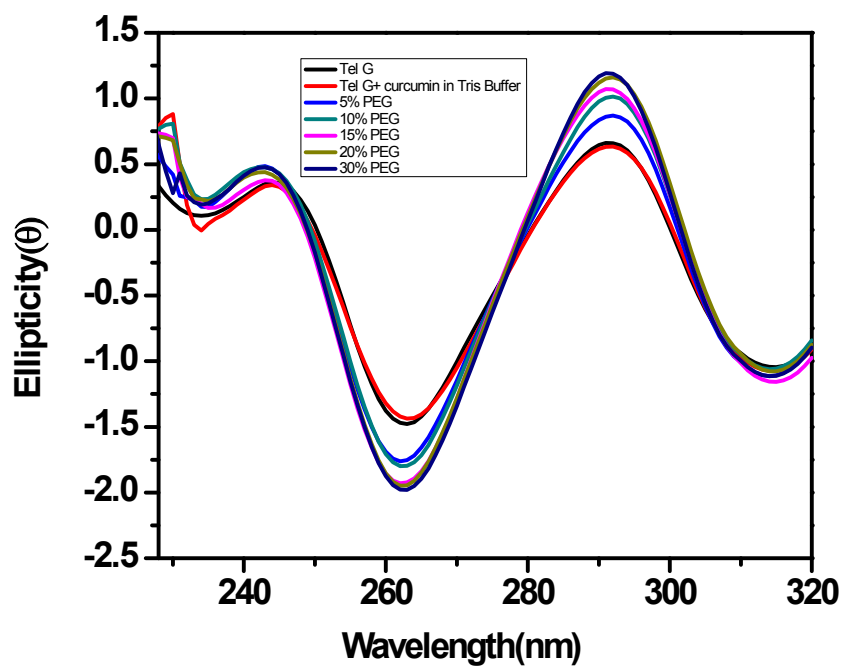

**Figure S2:** CD titration of 5 $\mu$ M AG<sub>3</sub>(T<sub>2</sub>AG<sub>3</sub>)<sub>3</sub> with curcumin (20  $\mu$ M) in increasing concentration of PEG 400.

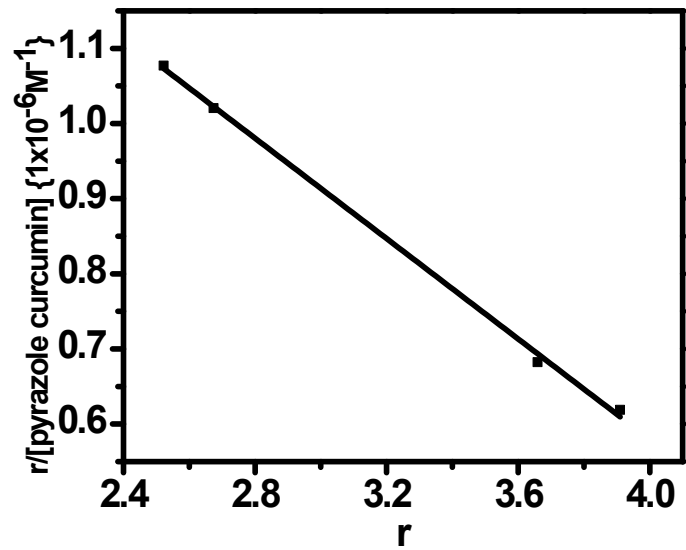

**Figure S3:** Binding curve of Pyrazole curcumin with  $AG_3(T_2AG_3)_3$  for  $r = 2.525$  to  $r = 3.9097$

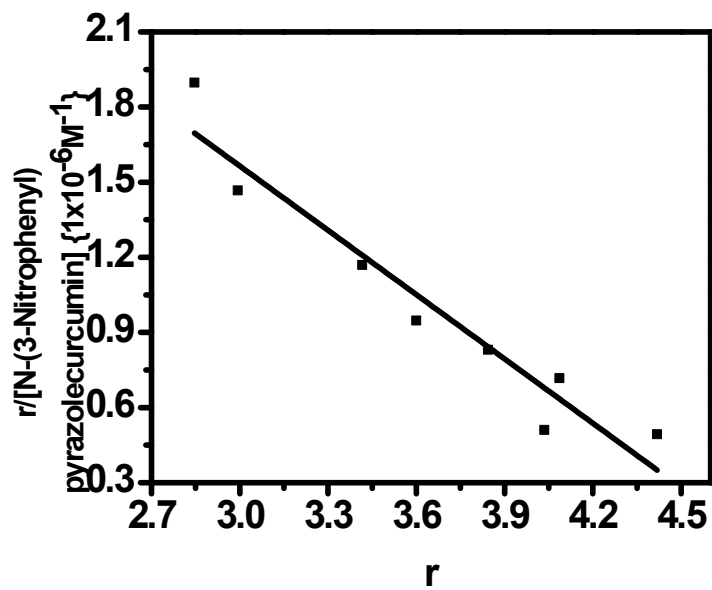

**Figure S4:** The binding curve of N-(3-Nitrophenyl) Pyrazole curcumin with  $AG_3(T_2AG_3)_3$  for  $r = 2.85$  to  $r = 4.425$

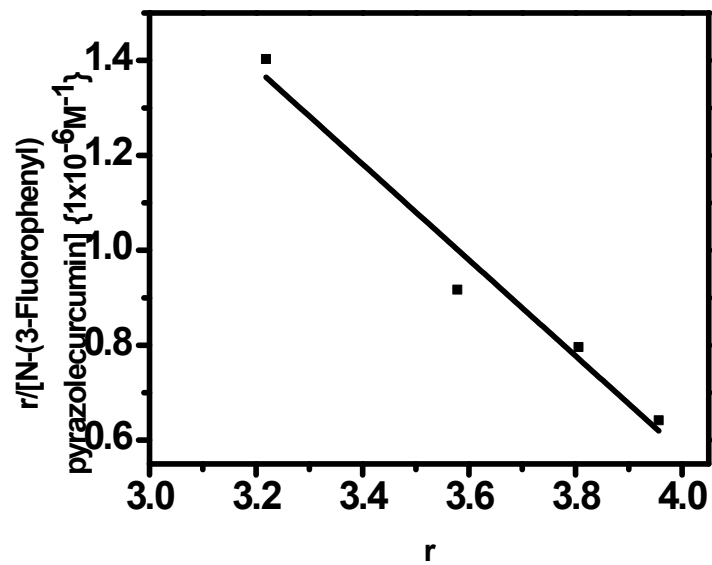

**Figure S5:** The binding curve of N-(3-Fluorophenyl) Pyrazole curcumin with  $AG_3(T_2AG_3)_3$  for  $r = 3.22$  to  $r = 3.95$

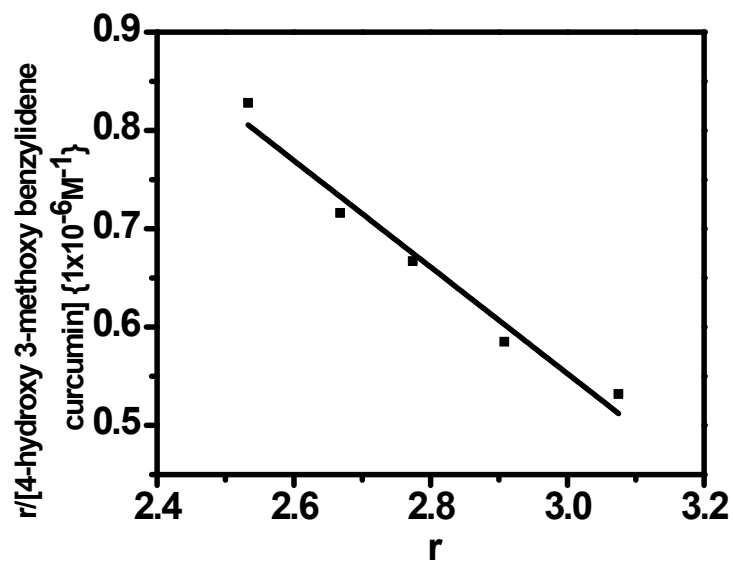

**Figure S6:** The binding curve of 4-hydroxy 3-methoxy benzylidene curcumin with  $AG_3(T_2AG_3)_3$  for  $r = 2.53$  to  $r = 3.07$

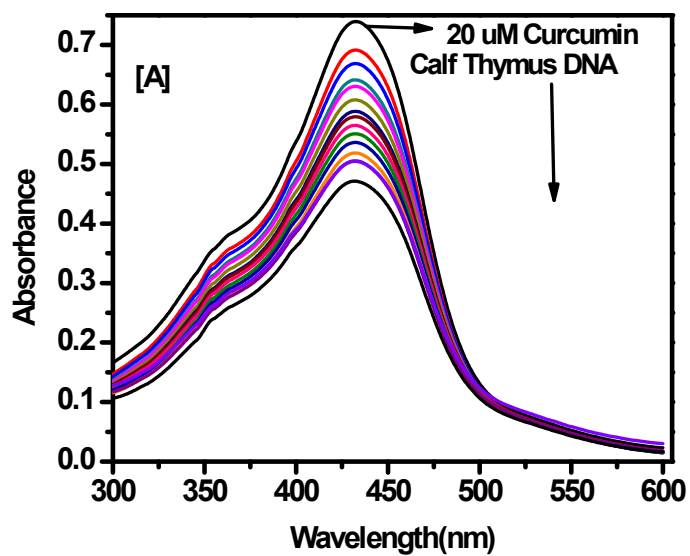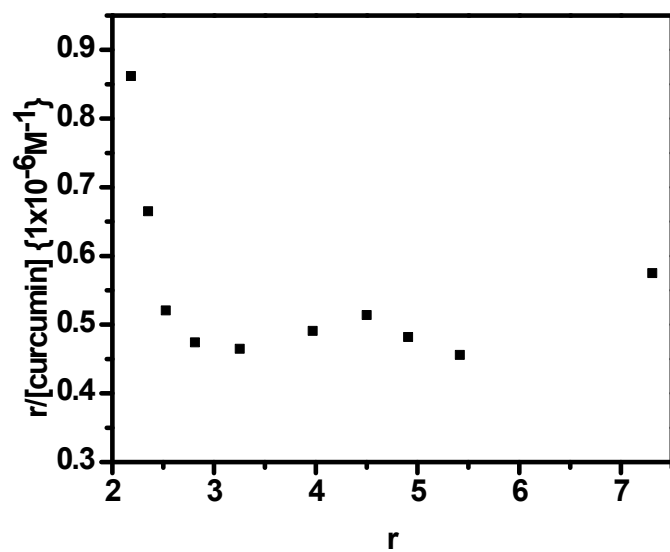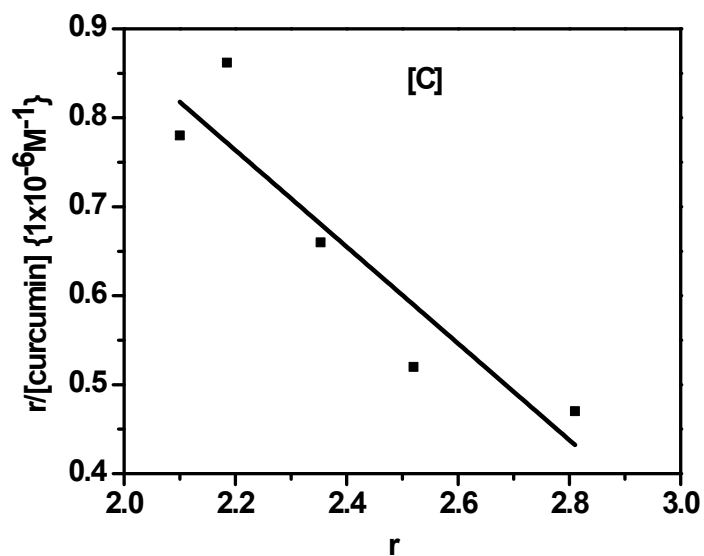

**Figure S7:** (a) Absorption spectra of 20  $\mu\text{M}$  curcumin with ct-DNA (b) Scatchard plots for curcumin ct-DNA.  $r$  is the mole of bound curcumin per mole of ct-DNA (c) Binding constant curves for curcumin with ct-DNA for  $r = 2.8$  to  $r = 2.1$



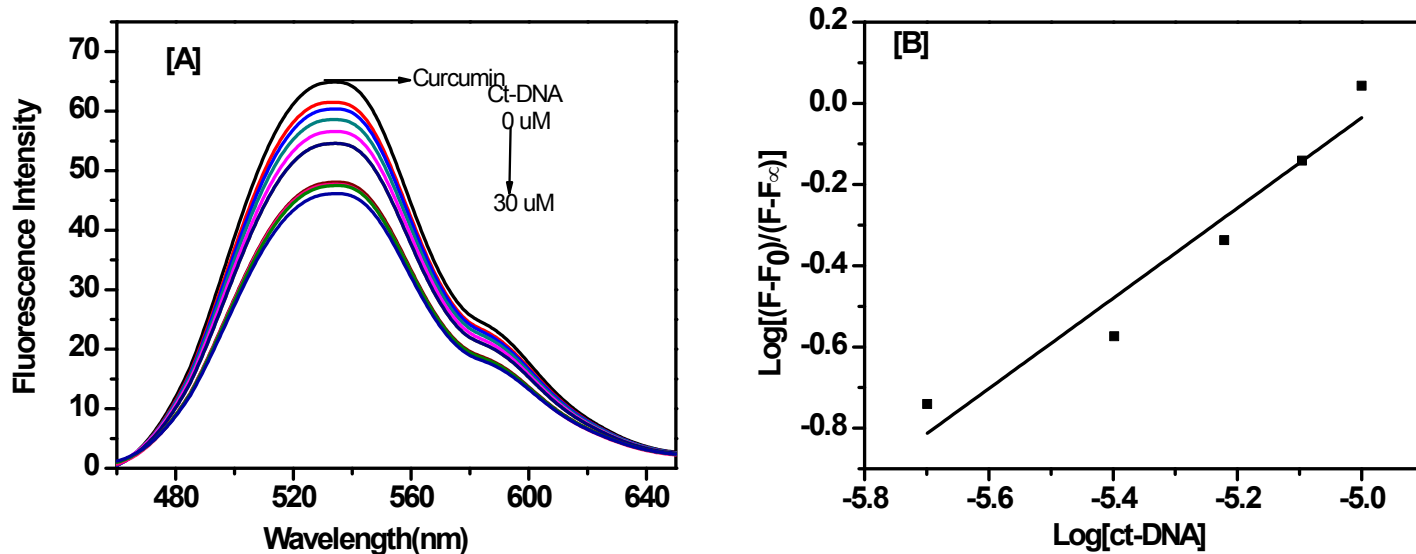

**Figure S8:** (a) Fluorescence emission spectra of curcumin (20 μM) in the absence and in the presence of increasing concentration of ct-DNA (ct-DNA: 0,2,4,6,8,10, 15, 20, 25 and 30 μM). (b) The double logarithmic plot to calculate  $K_b$ , [curcumin] = 20 μM and [ct-DNA] = 0 to 30 μM

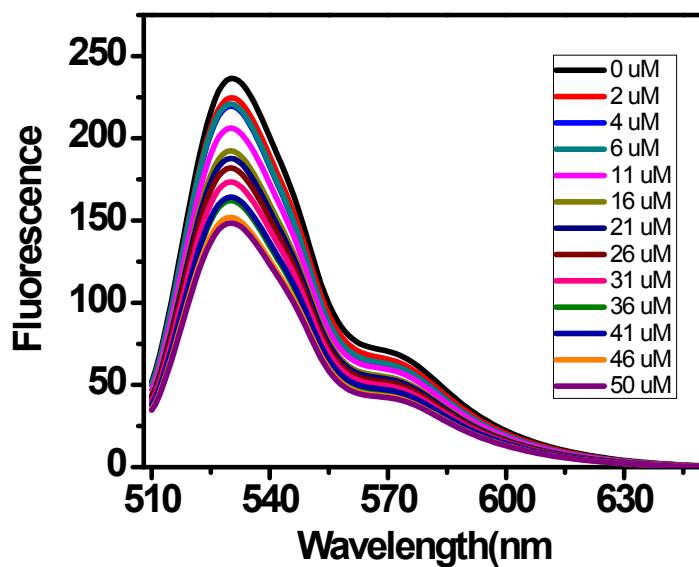

**Figure S9:** Fluorimetric Titration of TO with  $AG_3(T_2AG_3)_3$  and curcumin in 10mM sodium cacodylate buffer (pH 7.2) with 100 mM KCl

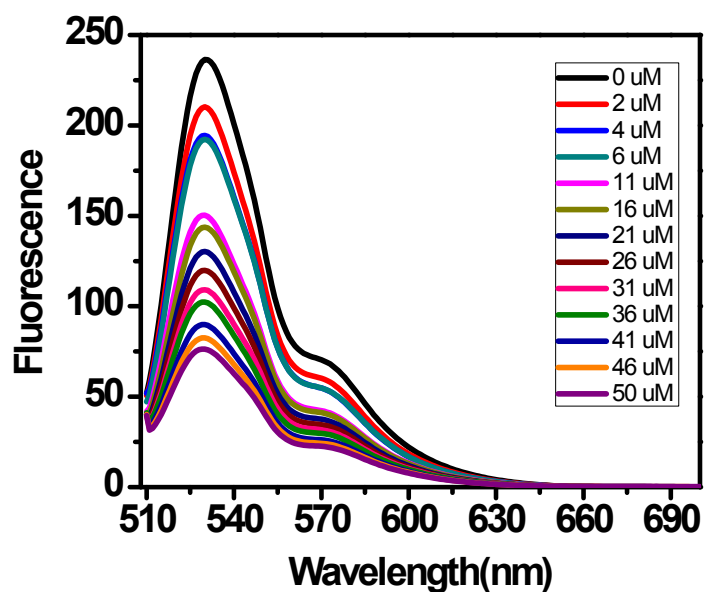

**Figure S10:** Fluorimetric Titration of TO with AG<sub>3</sub>(T<sub>2</sub>AG<sub>3</sub>)<sub>3</sub> and 4-(4-hydroxy 3-methoxy)benzylidene curcumin in 10mM sodium cacodylate buffer (pH 7.2) with 100 mM KCl

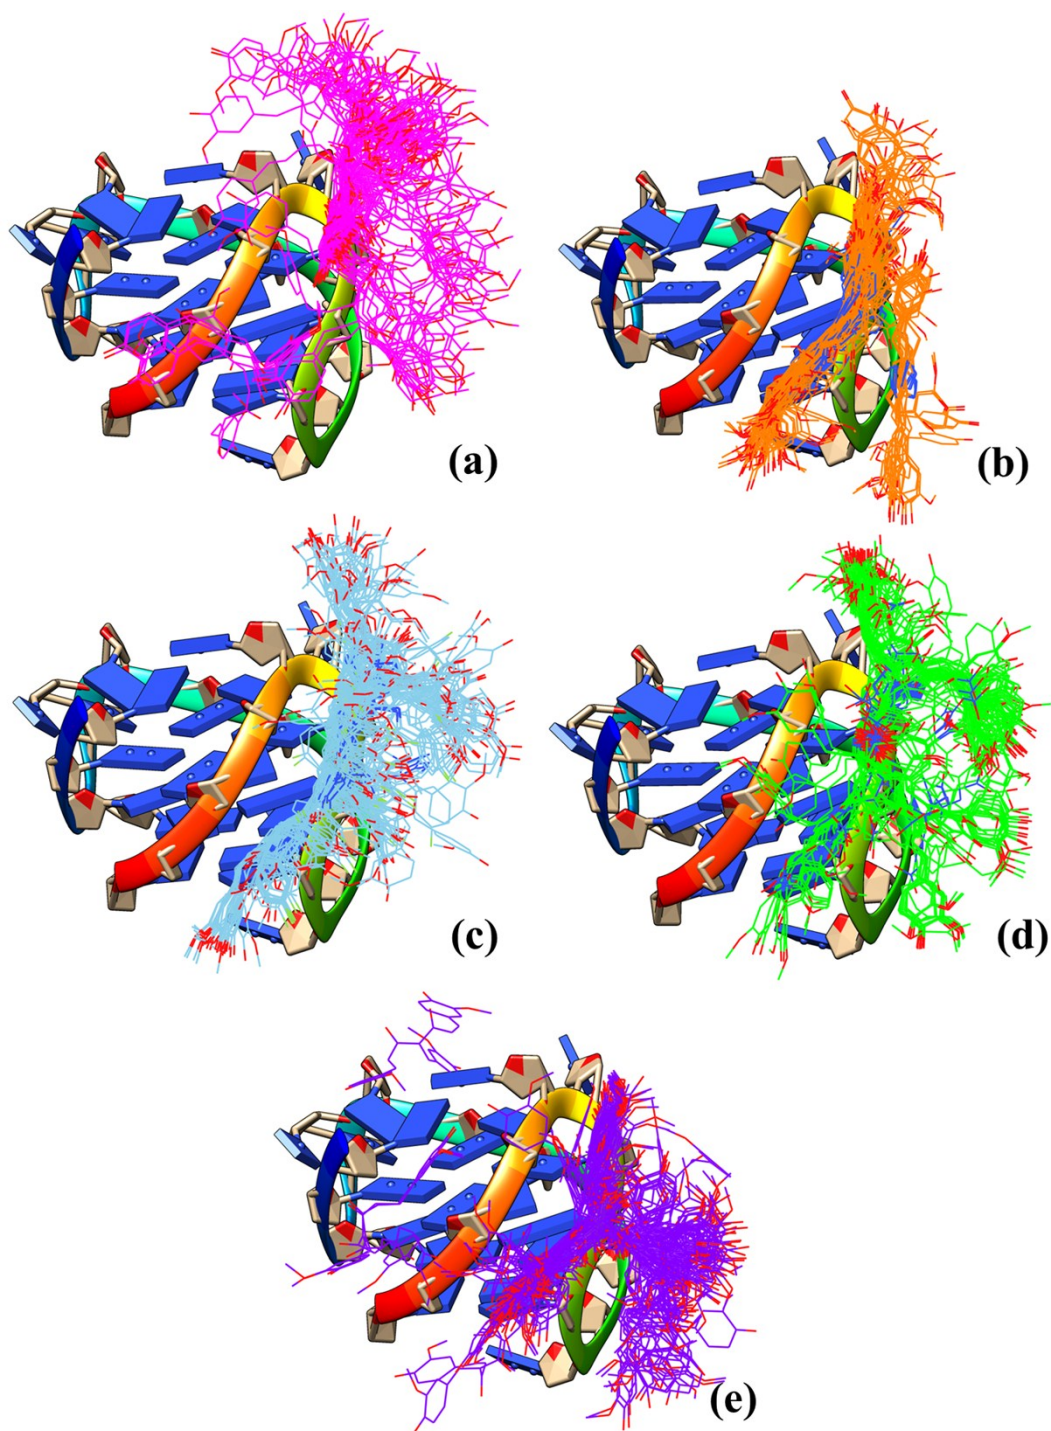

**Figure S11.** The docked conformers of curcumin and its four derivatives in the narrow groove of G-quadruplex hybrid form DNA (PDB ID: 2HY9). Shown are the 100 docked conformations of (a) Curcumin, (b) Pyrazole curcumin, (c) N-(3-Fluorophenyl) pyrazole curcumin, (d) N-(3-Nitrophenyl) pyrazole curcumin and (e) 4-(4-Hydroxy-3-methoxy) benzylidene curcumin

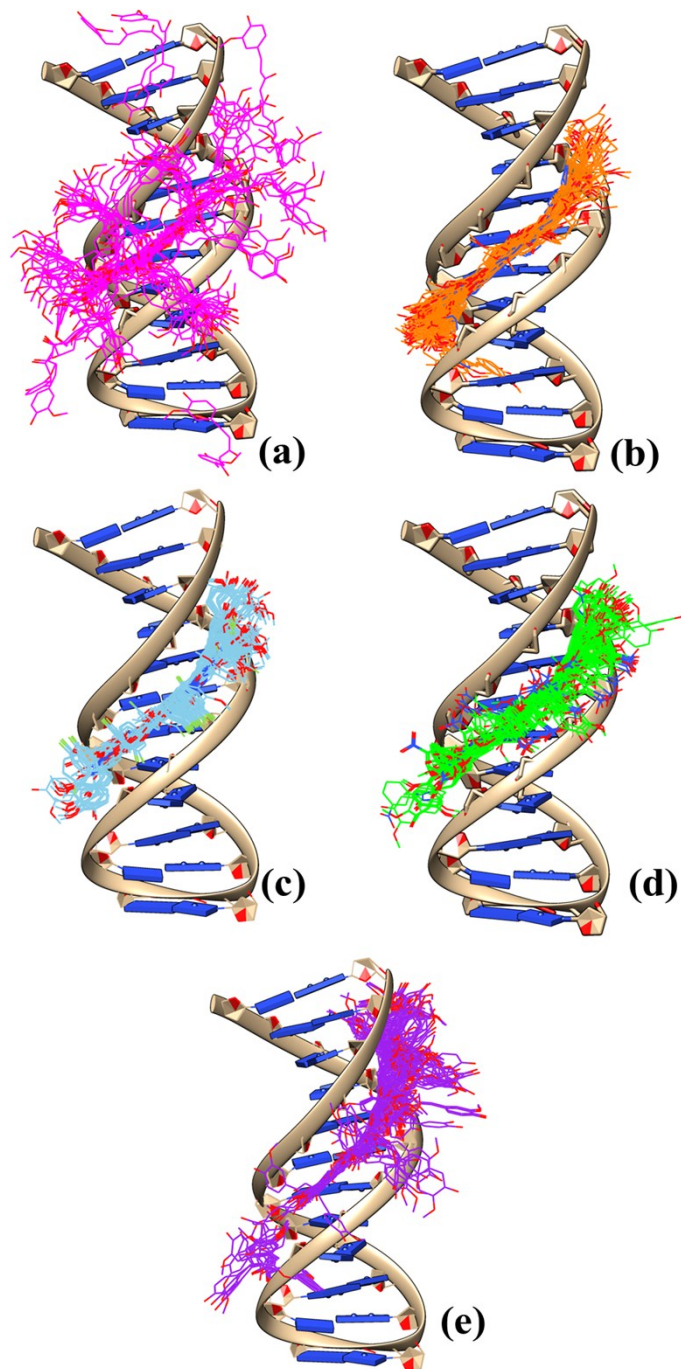

**Figure S12.** The docked conformers of curcumin and its four derivatives in the minor groove of B-DNA (PDB ID: 1BNA). Shown are the 100 docked conformations of (a) Curcumin, (b) Pyrazole curcumin, (c) N-(3-Fluorophenyl) pyrazole curcumin, (d) N-(3-Nitrophenyl) pyrazole curcumin and (e) 4-(4-Hydroxy-3-methoxy) benzylidene curcumin.

**Mass Spectrum and  $^1\text{H}$  NMR Spectrum compounds (2-5):**

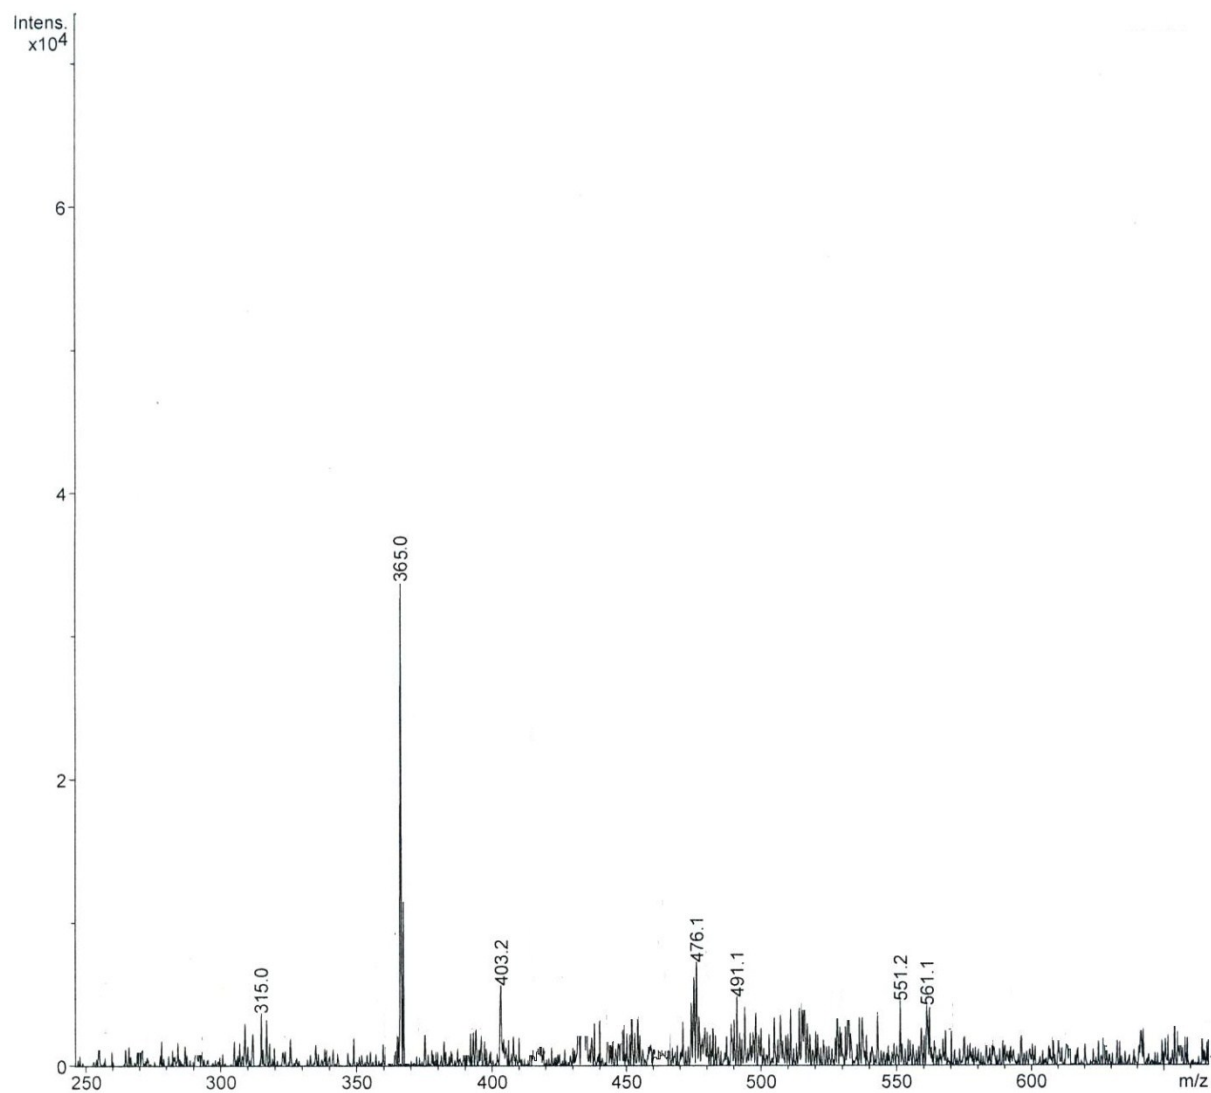

**Figure S13.** Mass Spectrum of Curcumin pyrazole (2)

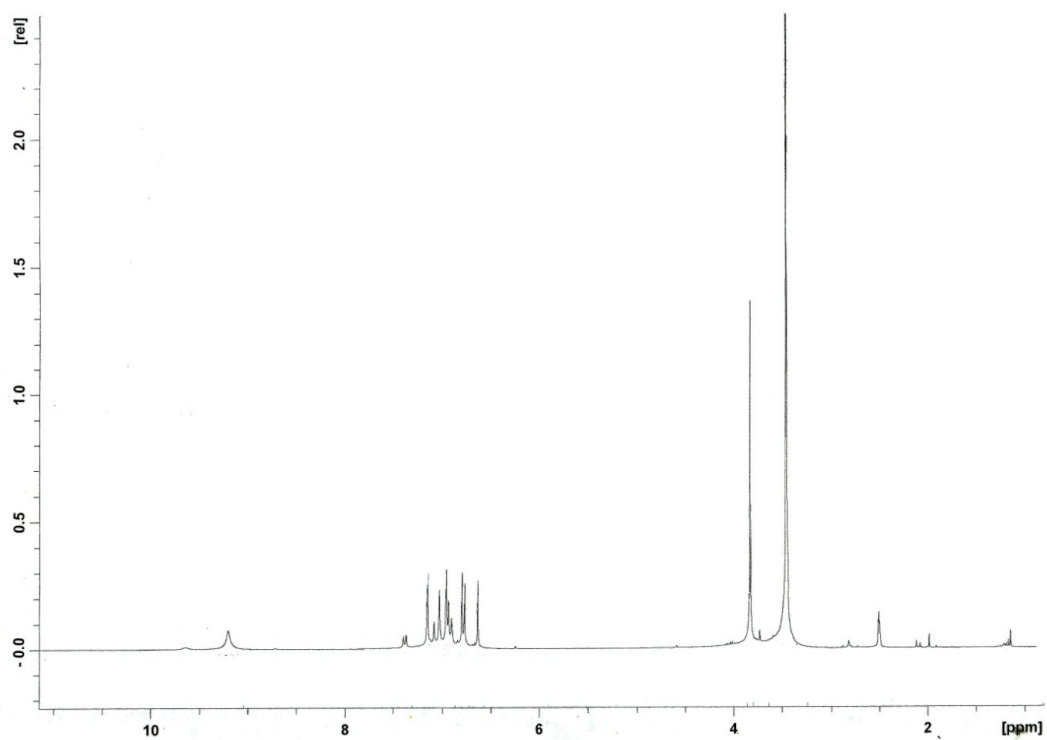

**Figure S14.** <sup>1</sup>H NMR Spectrum of Curcumin pyrazole (**2**) in DMSO-*d*<sub>6</sub>

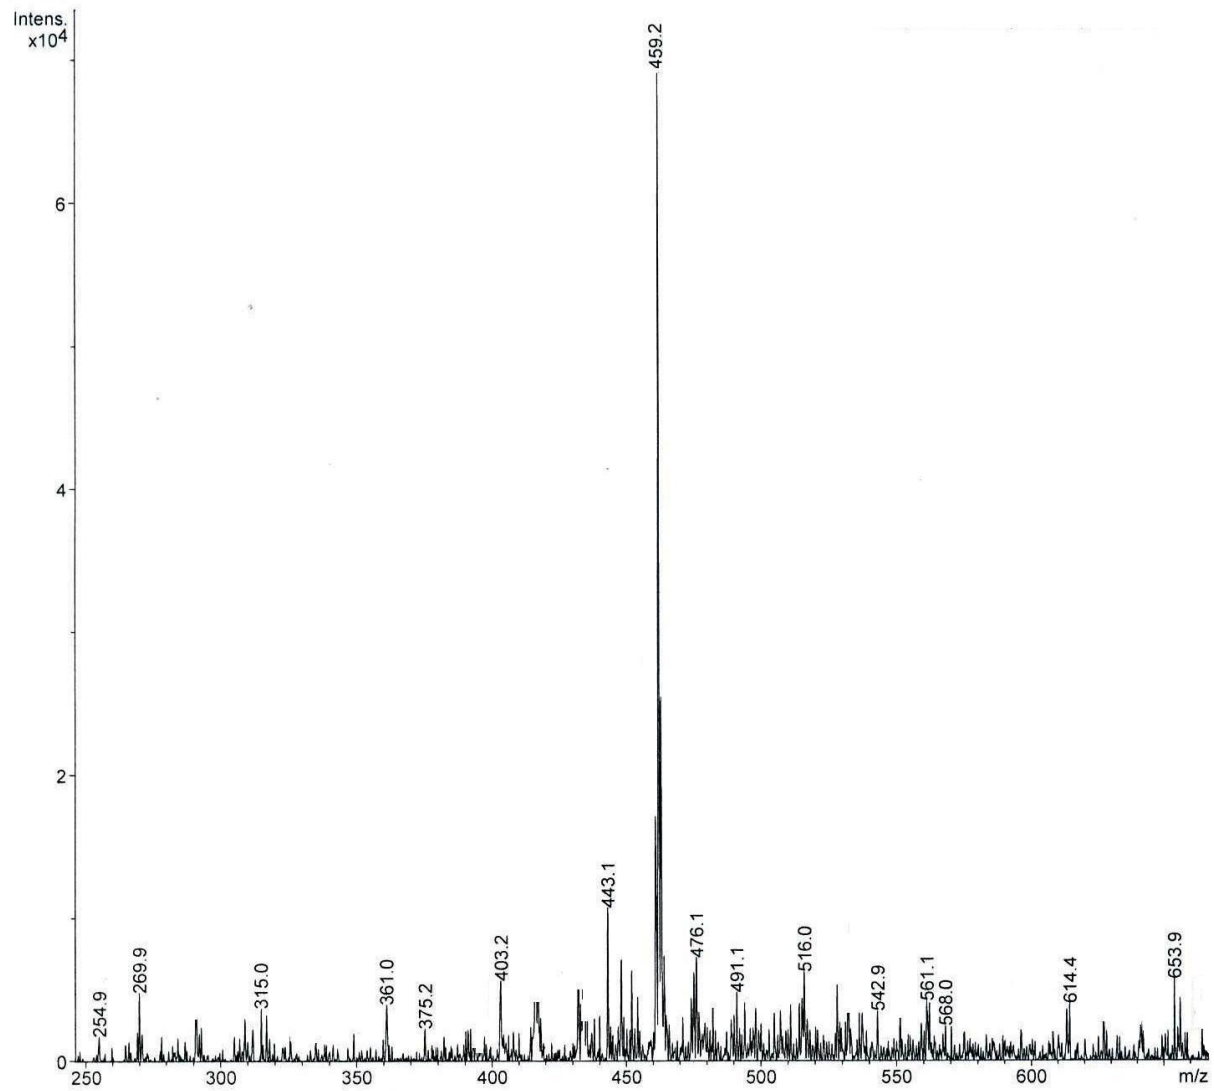

**Figure S15.** Mass Spectrum of *N*-(3-Fluorophenylpyrazole) Curcumin (3)



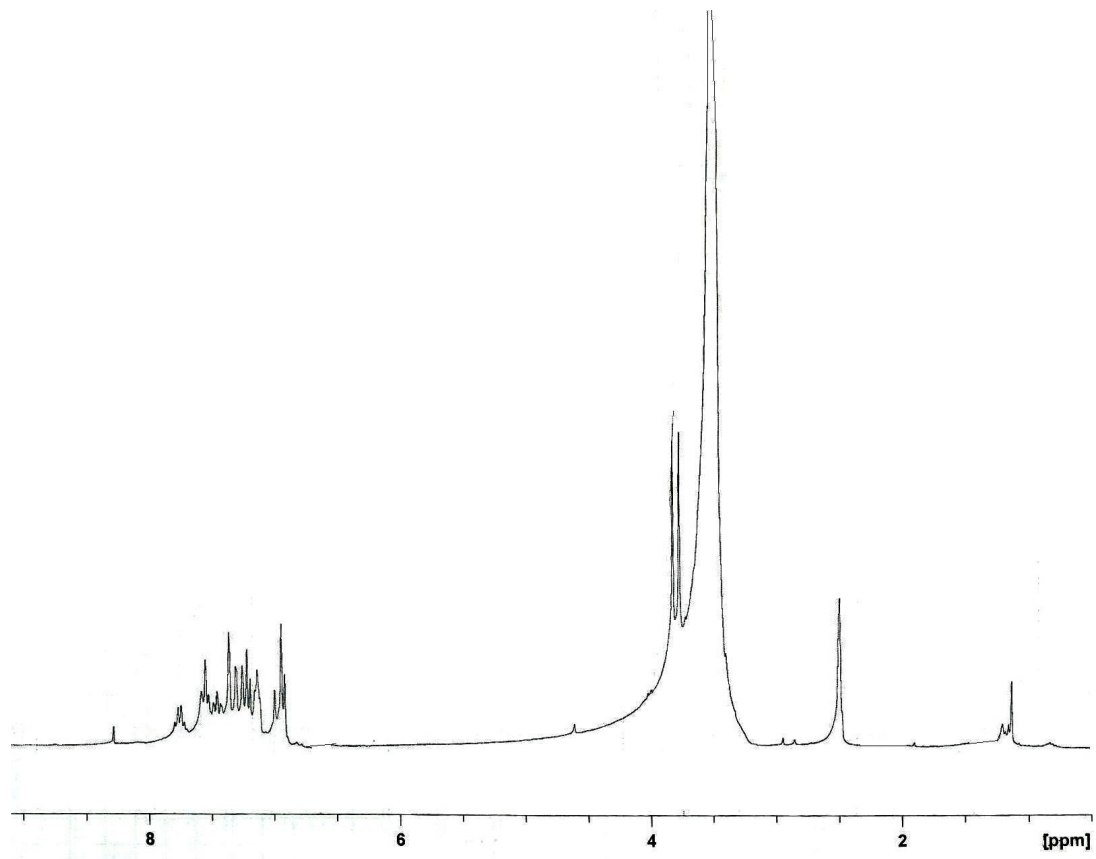

**Figure S16.**  $^1\text{H}$  NMR Spectrum of *N*-(3-Fluorophenylpyrazole) Curcumin (**3**) in  $\text{DMSO-}d_6$

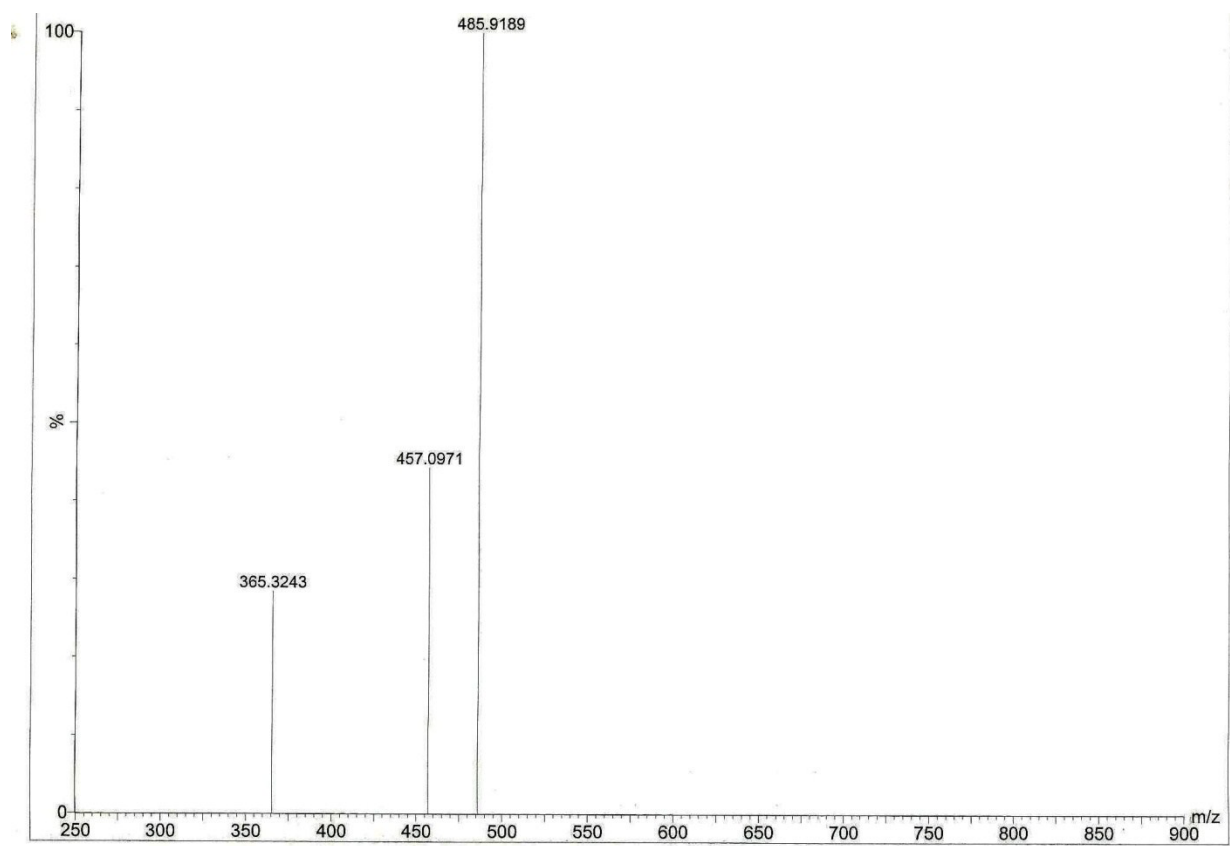

**Figure S17.** Mass Spectrum of *N*-(3-Nitrophenylpyrazole) Curcumin (**4**)

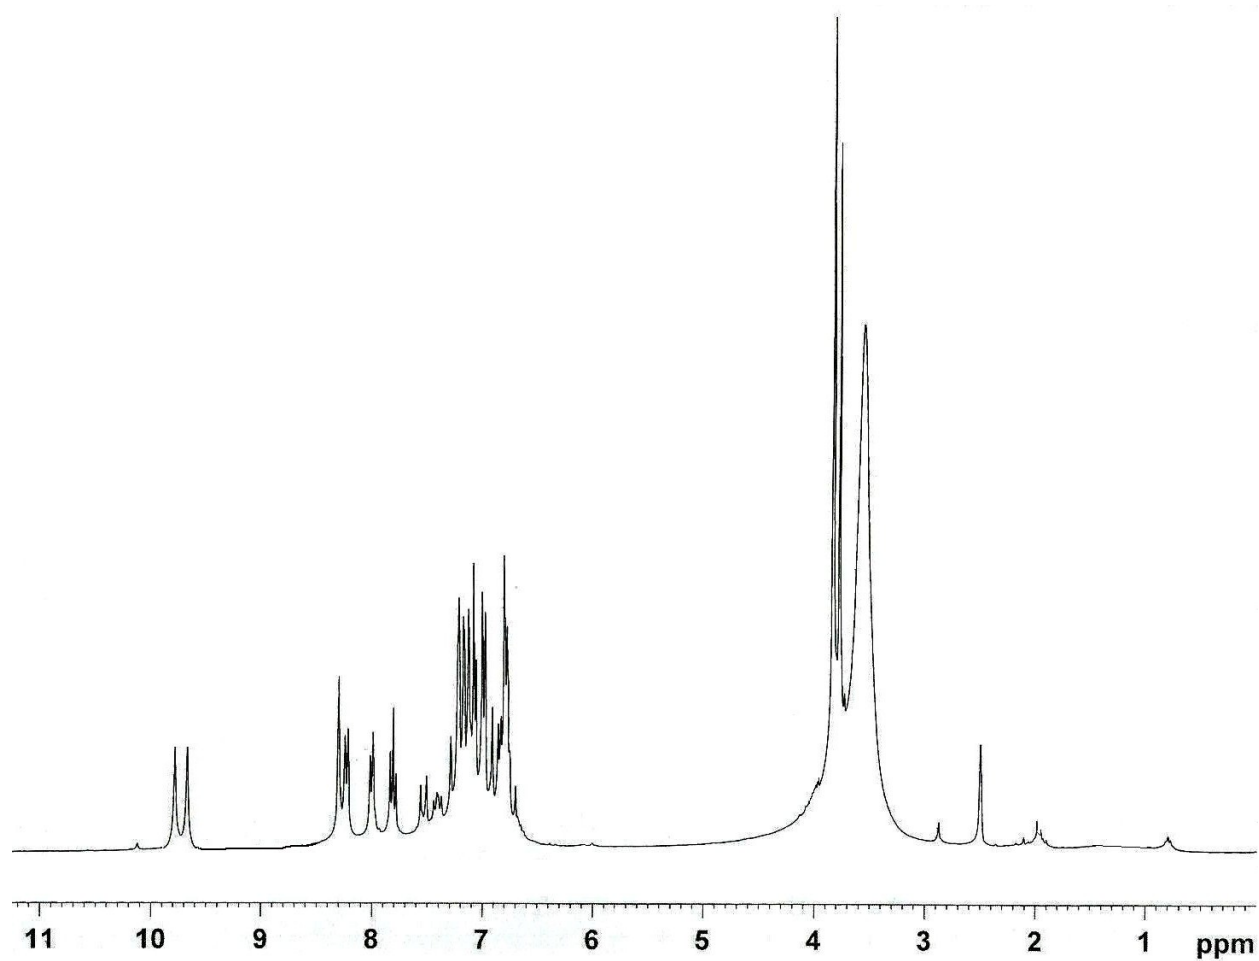

**Figure S18.** <sup>1</sup>H NMR Spectrum of *N*-(3-Nitrophenyl)pyrazole Curcumin (**4**) in DMSO-*d*<sub>6</sub>

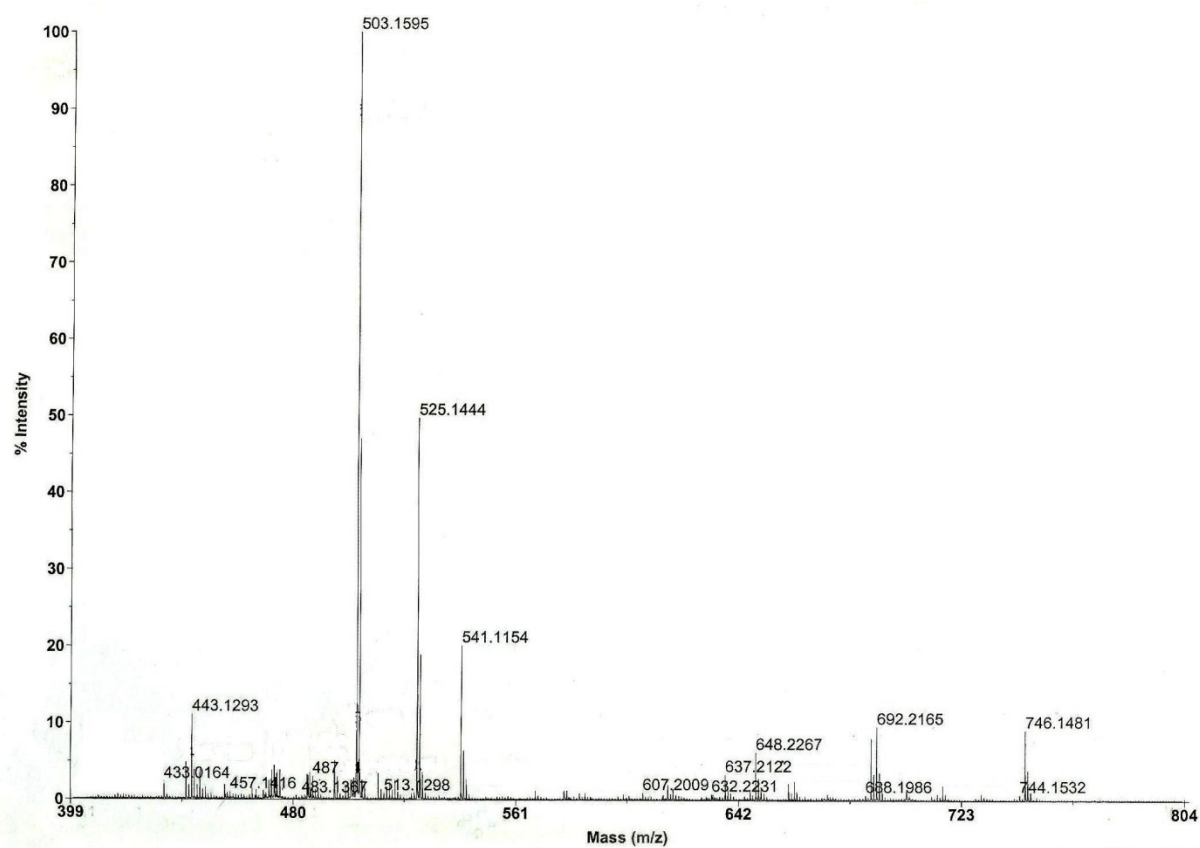

**Figure S19.** Mass Spectrum of 4-(4-Hydroxy-3-methoxybenzylidene) curcumin (**5**)

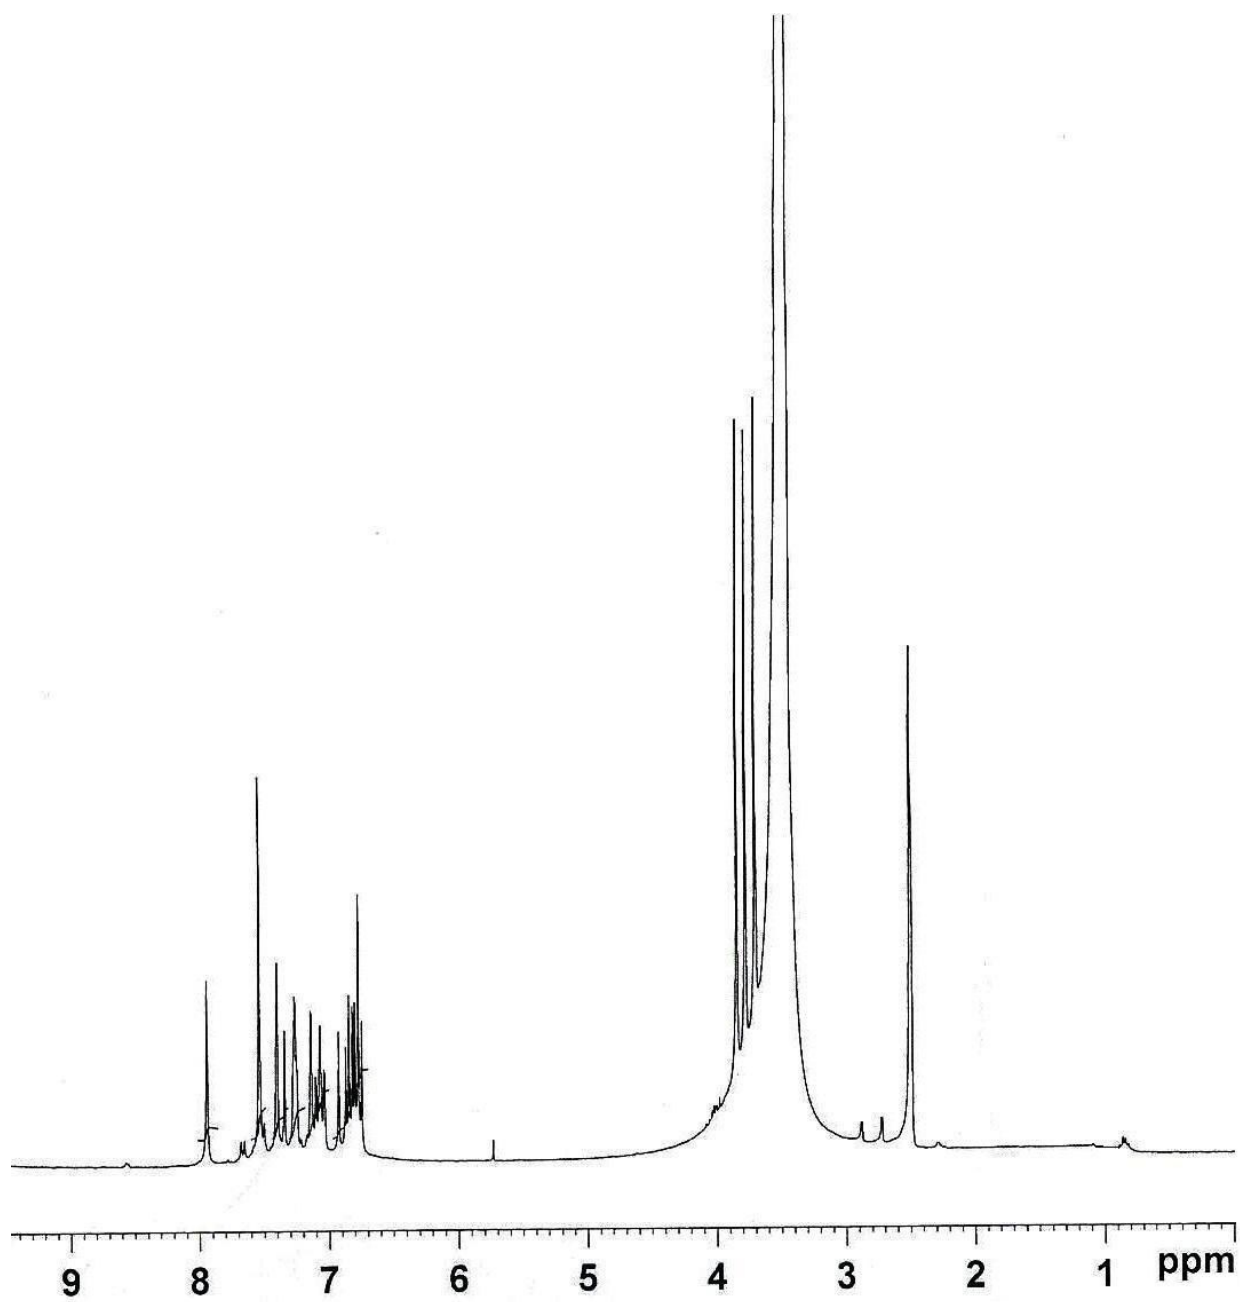

**Figure S20.**  $^1\text{H}$  NMR Spectrum of 4-(4-Hydroxy-3-methoxybenzylidene) curcumin (**5**) in  $\text{DMSO-}d_6$
